# Supplementary material
Source: publisher site journal article supplement (http://kjim.org/upload/media/kjim-2021-088-suppl5.pdf)
Supplement: Supplementary file 1 [file kjim-2021-088-suppl5.pdf]

**Supplementary Table 5. Hemocompatibility-associated adverse events compared between HeartMate II vs. HVAD devices**

| Adverse event                          | Total<br>(n = 50) | HeartMate II<br>(n = 17) | HVAD<br>(n = 33) | <i>p</i> value |
|----------------------------------------|-------------------|--------------------------|------------------|----------------|
| Suspected or confirmed pump thrombosis |                   |                          |                  |                |
| All patients (n = 50)                  | 2 (4.0)           | 2 (11.8)                 | 0                | 0.111          |
| BTT/BTC (n = 30)                       | 2 (6.7)           | 2 (20.0)                 | 0                | 0.103          |
| DT (n = 20)                            | 0                 | 0                        | 0                | -              |
| Any stroke                             |                   |                          |                  |                |
| All patients (n = 50)                  | 16 (32.0)         | 4 (23.5)                 | 12 (36.4)        | 0.357          |
| BTT/BTC (n = 30)                       | 9 (30.0)          | 2 (20.0)                 | 7 (35.0)         | 0.675          |
| DT (n = 20)                            | 7 (35.0)          | 2 (28.6)                 | 5 (38.5)         | 1.000          |
| Ischemic stroke                        |                   |                          |                  |                |
| All patients (n = 50)                  | 8 (16.0)          | 2 (11.8)                 | 6 (18.2)         | 0.699          |
| BTT/BTC (n = 30)                       | 4 (13.3)          | 1 (10.0)                 | 3 (15.0)         | 1.000          |
| DT (n = 20)                            | 4 (20.0)          | 1 (14.3)                 | 3 (23.1)         | 1.000          |
| Hemorrhagic stroke                     |                   |                          |                  |                |
| All patients (n = 50)                  | 9 (18.0)          | 3 (17.6)                 | 6 (18.2)         | 1.000          |
| BTT/BTC (n = 30)                       | 5 (16.7)          | 1 (10.0)                 | 4 (20.0)         | 0.640          |
| DT (n = 20)                            | 4 (20.0)          | 2 (28.6)                 | 2 (15.4)         | 0.587          |
| Major bleeding                         |                   |                          |                  |                |
| All patients (n = 50)                  | 26 (52.0)         | 9 (52.9)                 | 17 (51.5)        | 0.924          |
| BTT/BTC (n = 30)                       | 17 (56.7)         | 5 (50.0)                 | 12 (60.0)        | 0.705          |
| DT (n = 20)                            | 9 (45.0)          | 4 (57.1)                 | 5 (38.5)         | 0.642          |
| Bleeding requiring surgery             |                   |                          |                  |                |
| All patients (n = 50)                  | 7 (14.0)          | 4 (23.5)                 | 3 (9.1)          | 0.210          |
| BTT/BTC (n = 30)                       | 4 (13.3)          | 2 (20.0)                 | 2 (10.0)         | 0.584          |
| DT (n = 20)                            | 3 (15.0)          | 2 (28.6)                 | 1 (7.7)          | 0.270          |
| Gastrointestinal bleeding              |                   |                          |                  |                |
| All patients (n = 50)                  | 13 (26.0)         | 3 (17.6)                 | 10 (30.3)        | 0.499          |
| BTT/BTC (n = 30)                       | 5 (23.3)          | 1 (10.0)                 | 6 (30.0)         | 0.372          |
| DT (n = 20)                            | 6 (30.0)          | 2 (28.6)                 | 4 (30.8)         | 1.000          |

Values are presented as number (%).

HVAD, HeartWare Ventricular Assist Device; BTT/BTC, bridge to transplantation/bridge to candidacy; DT, destination therapy.
